# Supplementary material for: Fitting mechanistic epidemic models to data: A comparison of simple Markov chain Monte Carlo approaches
Source: PubMed Central journal article supplement (PMC6027774; doi:10.1177/0962280217747054), 2018-05-30
Supplement: Supplemental_material.pdf [file Supplemental_material.pdf]

## Supplemental material

In the main text, we present the bias, RMSE, coverage and efficiency plots for aggregated forecast,  $\mathcal{R}_0$ , MGI,  $P_{\text{eff}}$ , and  $P_{\text{rep}}$ . Here, we present plots showing the other parameters (shape  $G_S$  and position  $G_P$  of the transmission kernel and process and observation overdispersion parameters  $\delta_P$  and  $\delta_{\text{obs}}$ ) and disaggregated forecasts (five forecast steps) that are excluded in the main text. We also add some representative plots of the simulated cases and forecast.

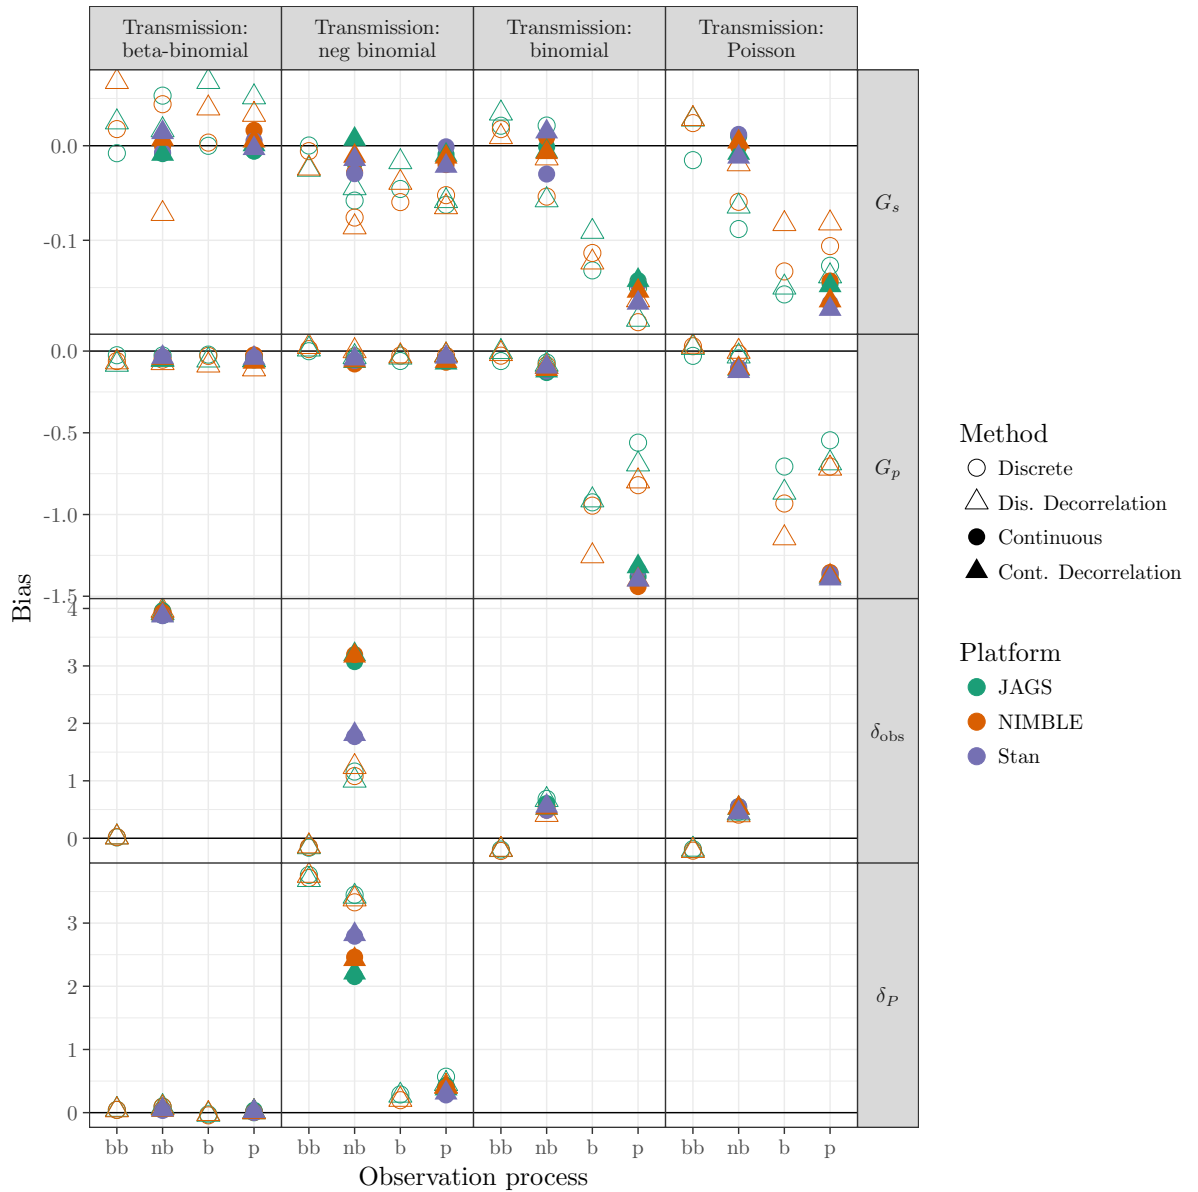

**Figure S1.** Comparison of bias for  $G_S$  (transmission shape),  $G_P$  (transmission position),  $\delta_{obs}$  (observation overdispersion), and  $\delta_P$  (process overdispersion: more detail given in Sect. 2.2) across different platforms (described in Sect. 2.3.1). Overdispersion parameter  $\delta_P$  is only applicable in models with dispersion in the transmission process (first and second left column panel) and overdispersion parameter  $\delta_{obs}$  is only applicable in models with dispersion in the observation process (first and second column within each column panel).

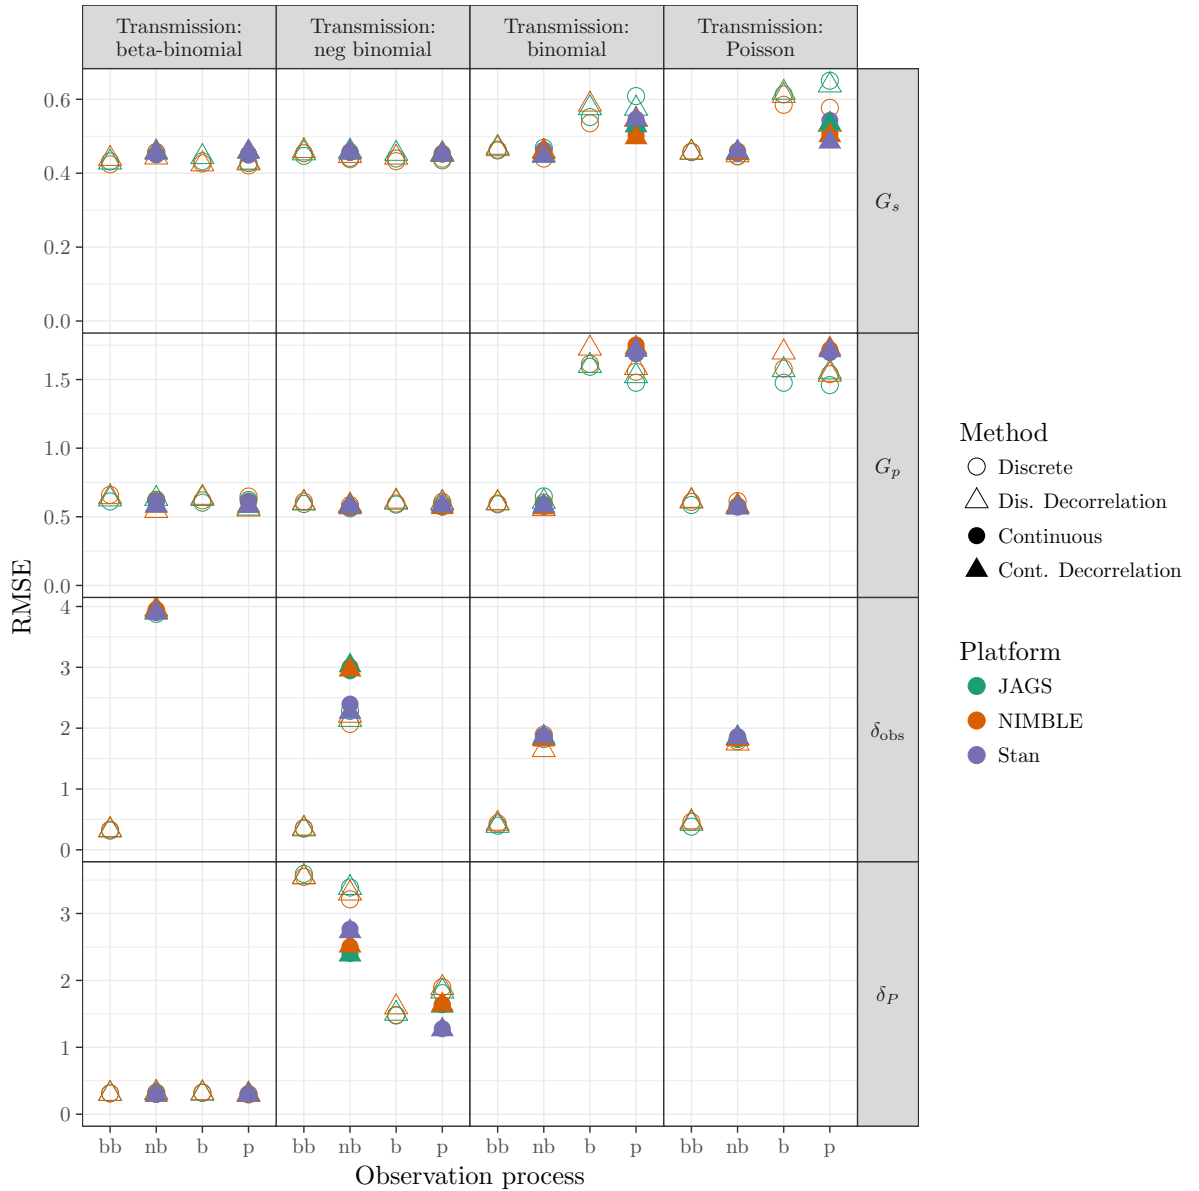

**Figure S2.** Comparison of RMSE for  $G_S$ ,  $G_P$ ,  $\delta_{obs}$ , and  $\delta_P$ . See Figure ?? in main text and Figure S1 in appendix for details.

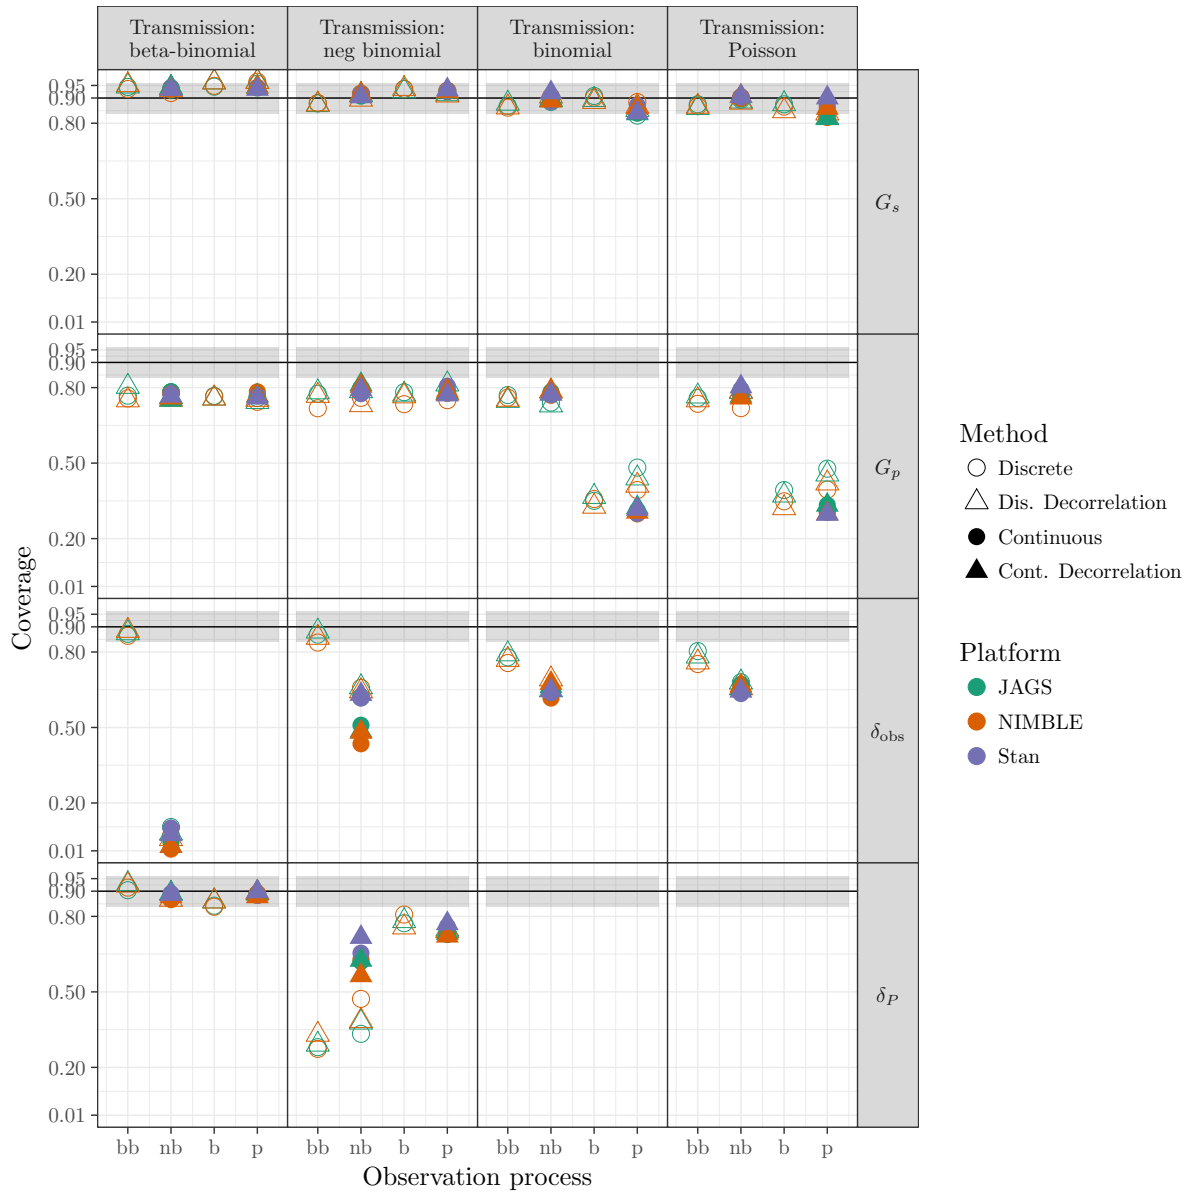

**Figure S3.** Comparison of coverage for  $G_S$ ,  $G_P$ ,  $\delta_{obs}$ , and  $\delta_P$ . See Figure ?? in main text and Figure S1 in appendix for details.

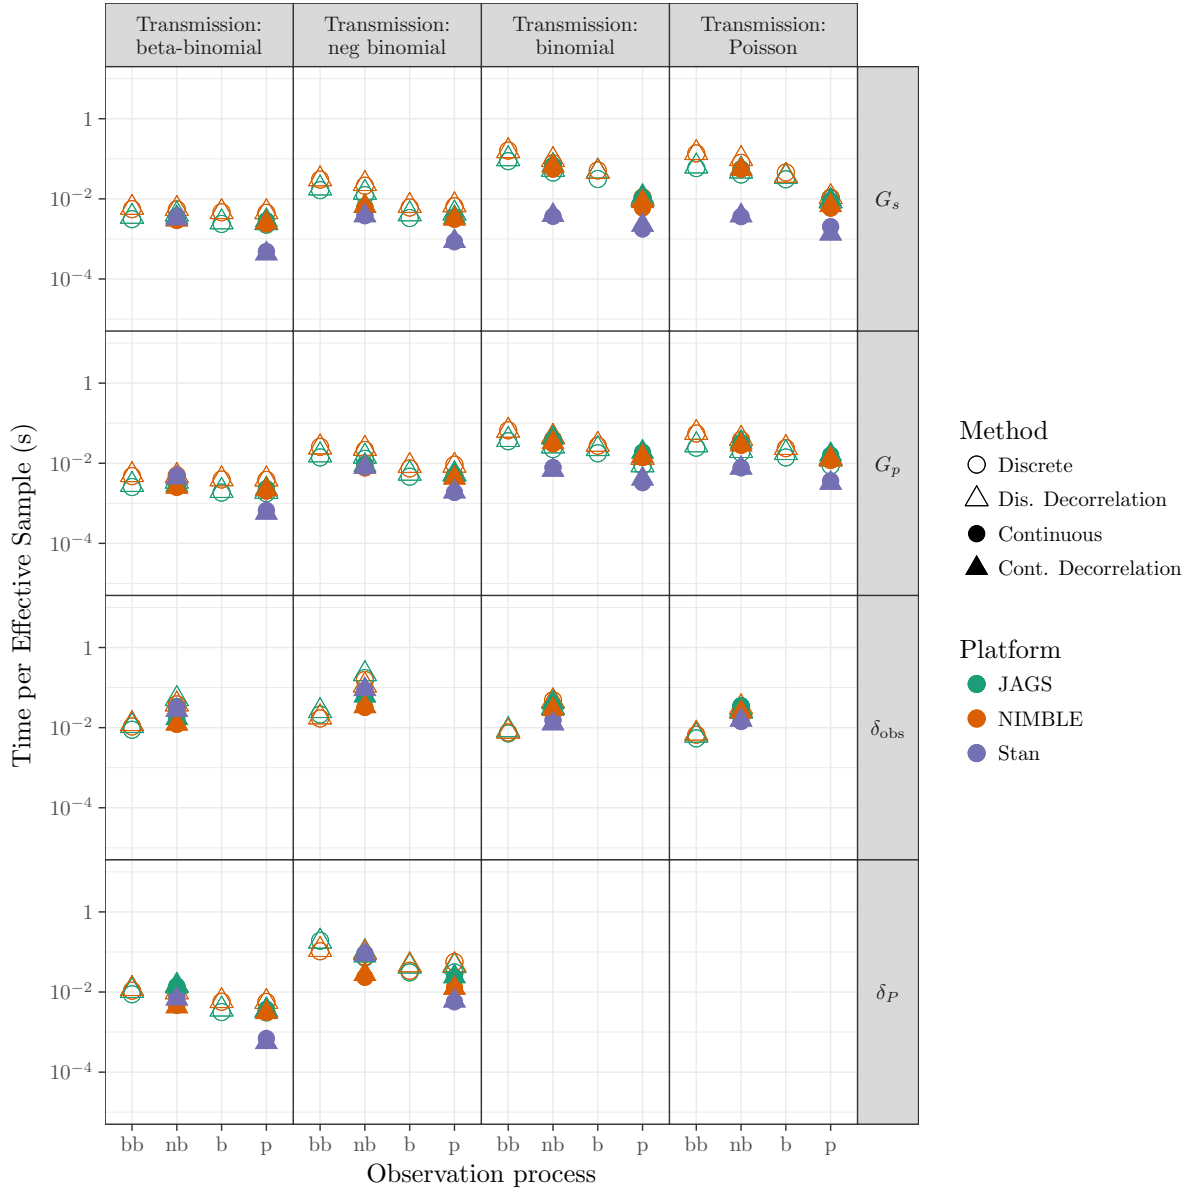

**Figure S4.** Comparison of coverage for  $G_S$ ,  $G_P$ ,  $\delta_{obs}$ , and  $\delta_P$ . See Figure ?? in main text and Figure S1 in appendix for details.

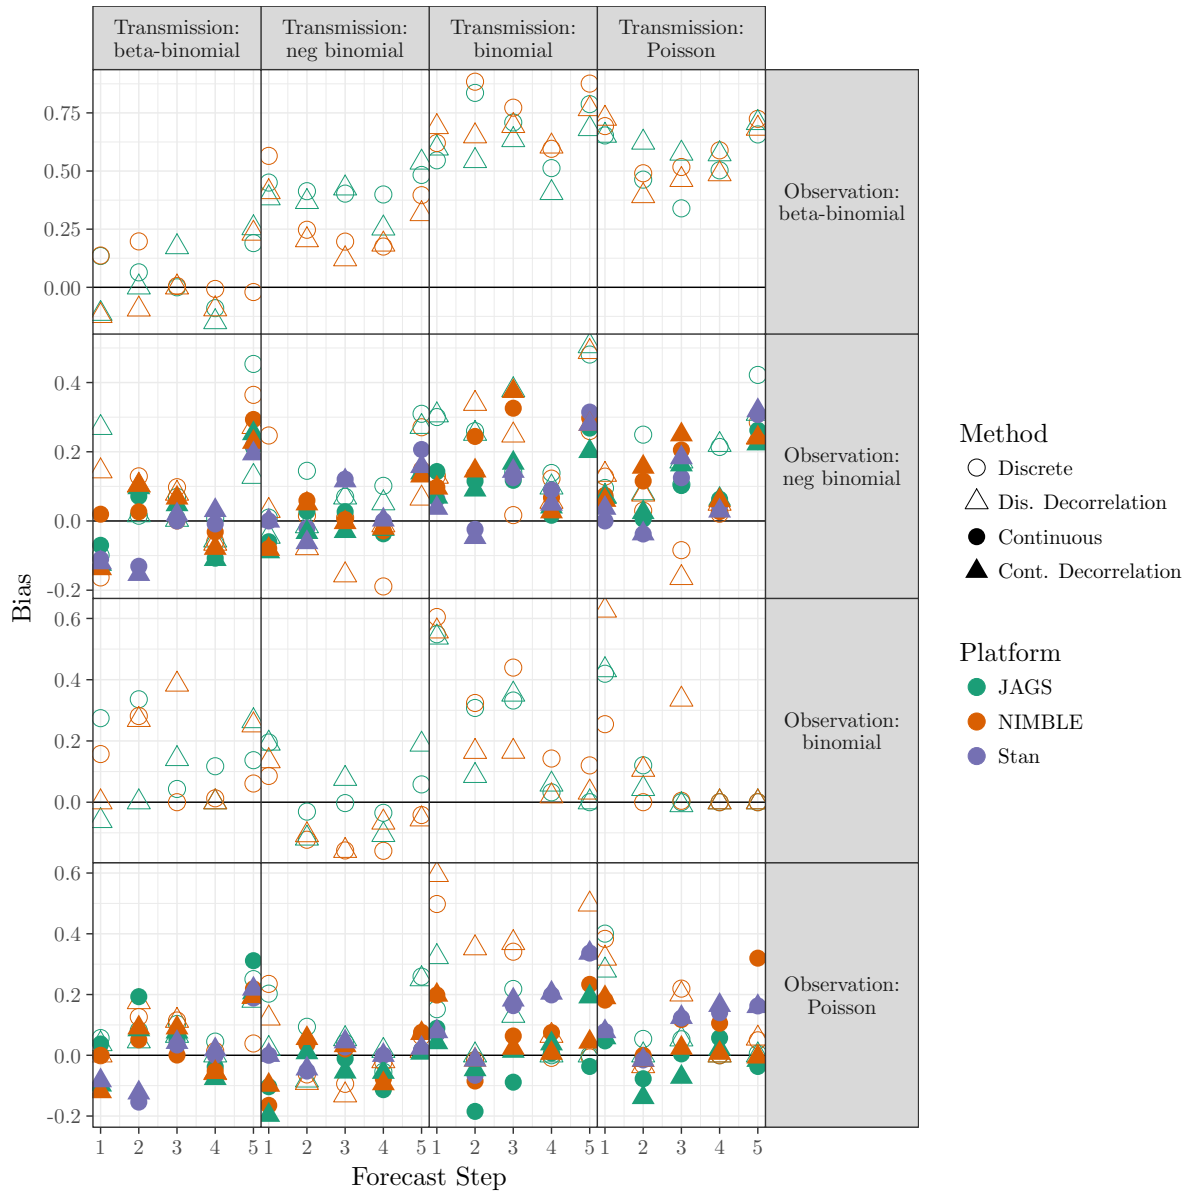

**Figure S5.** Comparison of bias for five forecast steps (described in Sect. 2.2) across different platforms (described in Sect. 2.3.1).

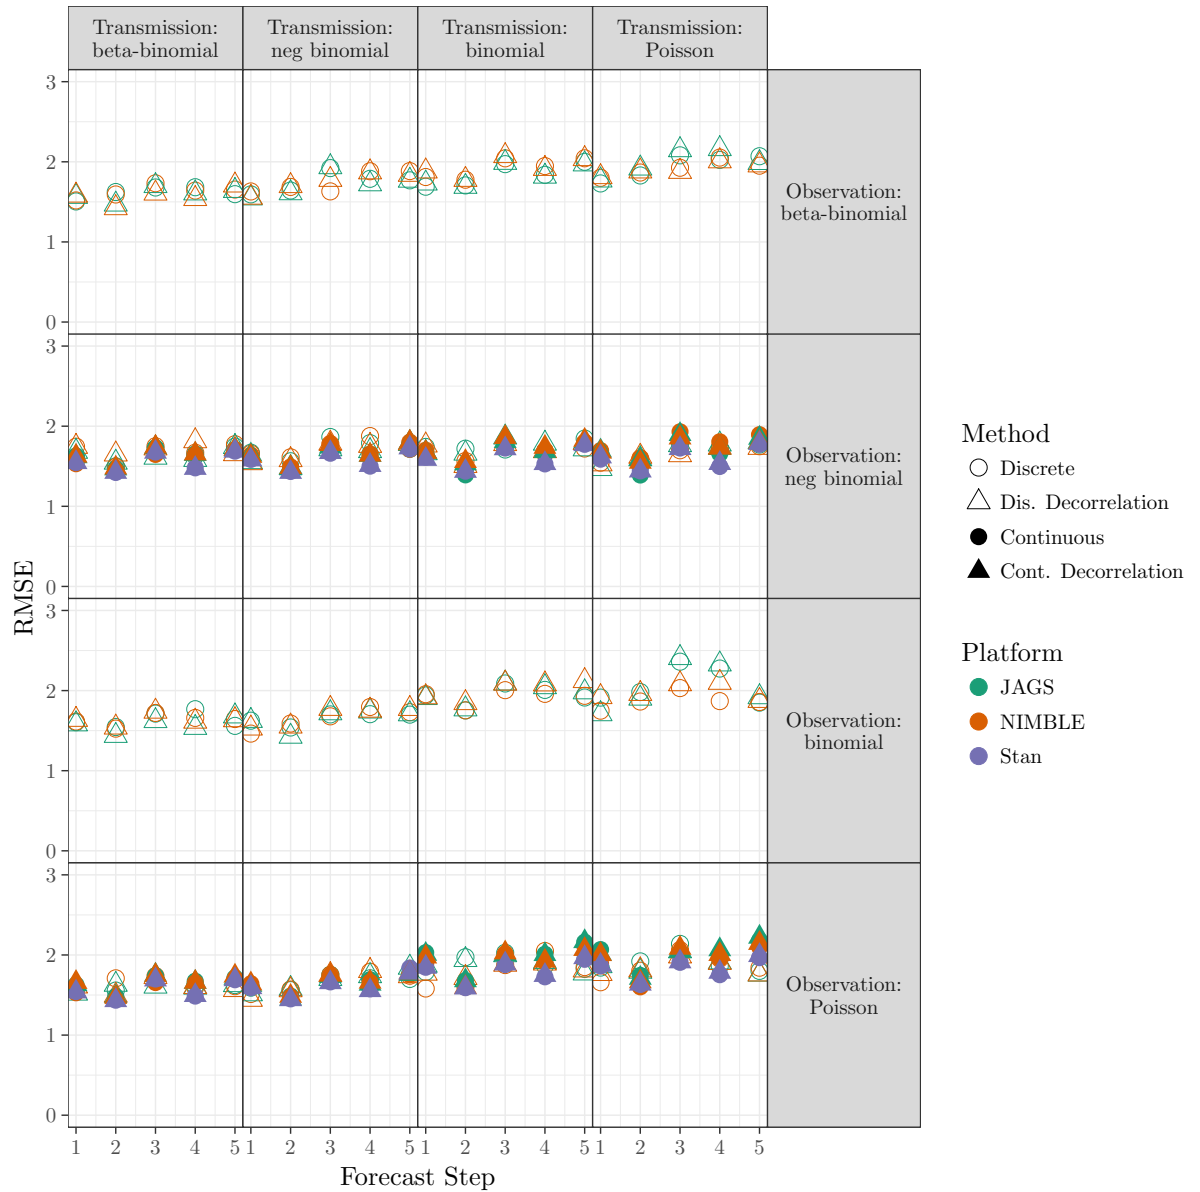

**Figure S6.** Comparison of RMSE for five forecast steps described in Sect. 2.2 across different platforms described in Sect. 2.3.1. See Figure ?? in the main text for details.

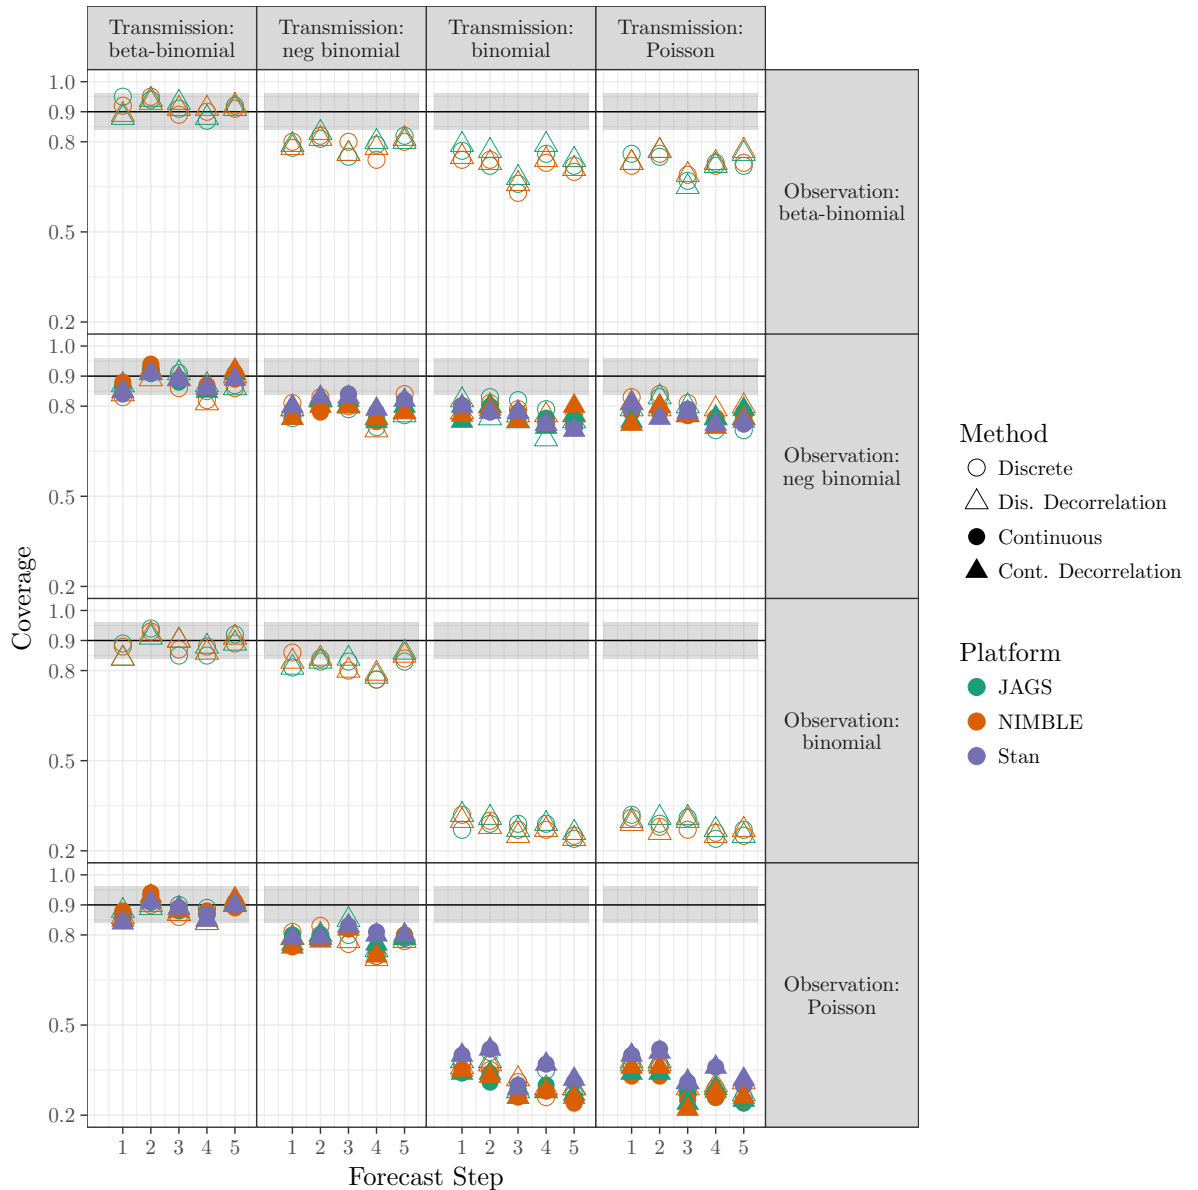

**Figure S7.** Comparison of coverage for five forecast steps described in Sect. 2.2 across different platforms described in Sect. 2.3.1. See Figure ?? in the main text for details.



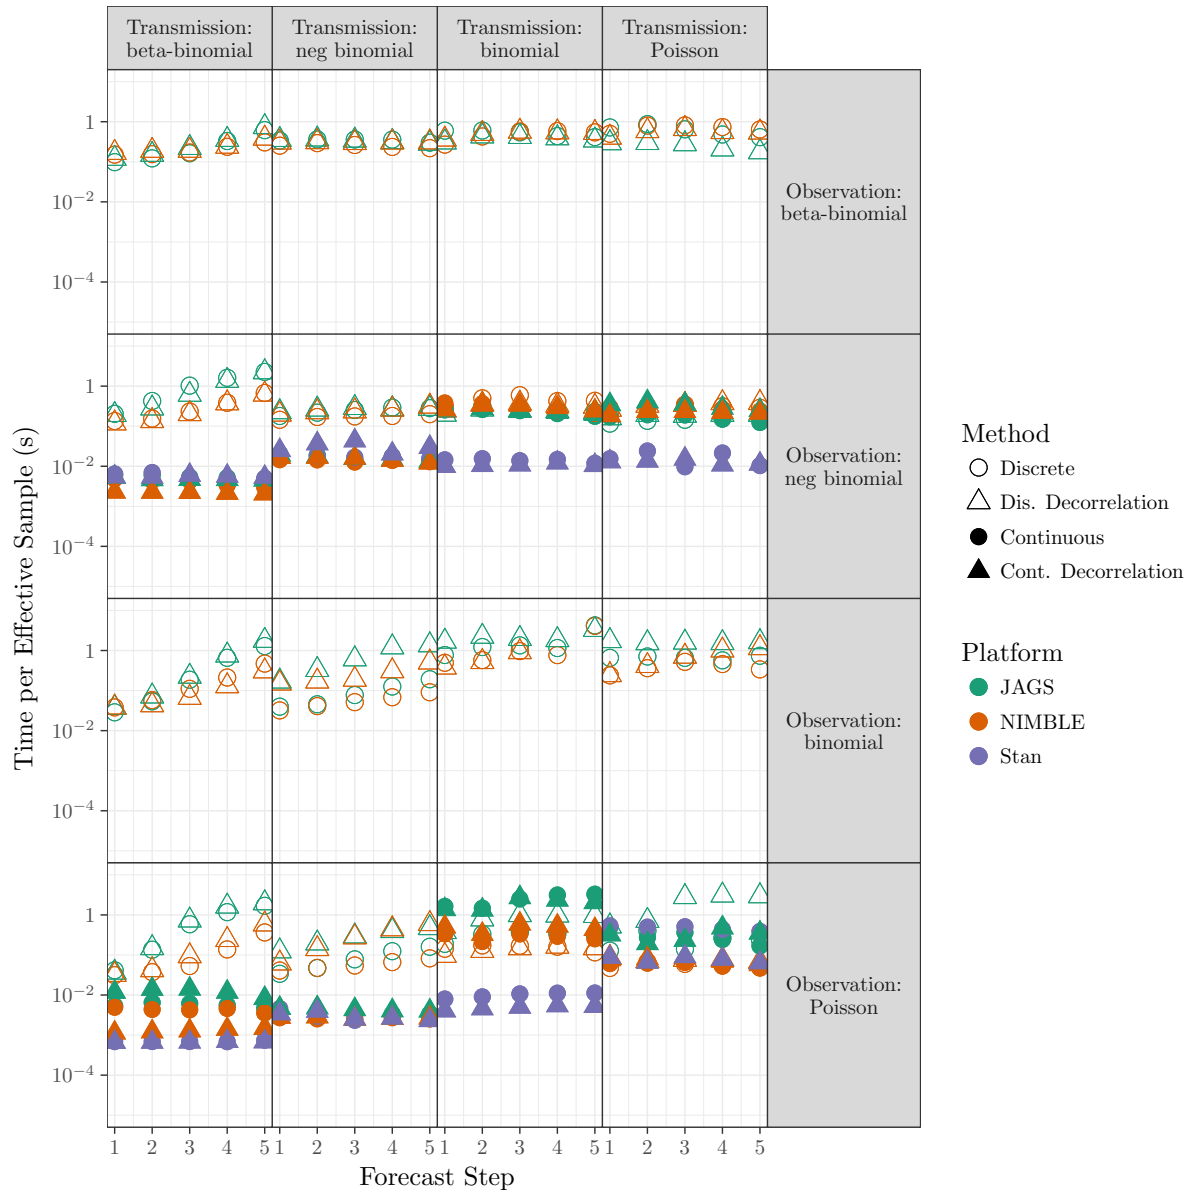

**Figure S8.** Comparison of sampling efficiency for five forecast steps described in Sect. 2.2 across different platforms described in Sect. 2.3.1. See Figure ?? in the main text for details.

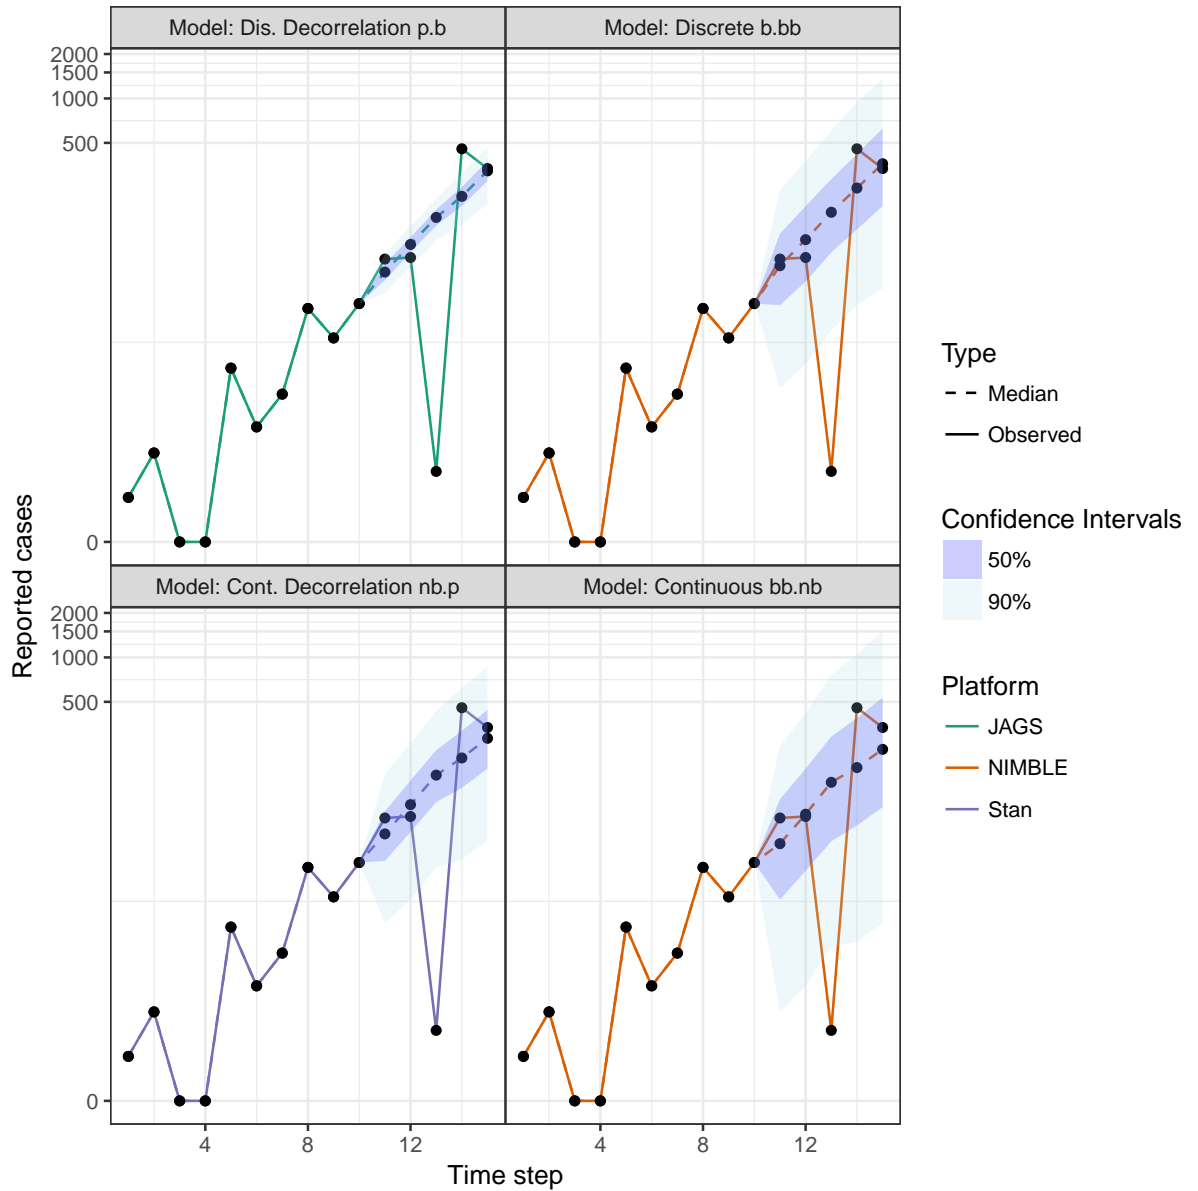

**Figure S9.** Comparison of forecast using combinations of transmission process, observation process, decorrelation, latent state variables, and platforms described in Sect 2.2 and 2.3.1. Moving from the top to bottom row adds overdispersion in the transmission process (binomial (b) and Poisson (p) to negative-binomial (nb) and beta-binomial (bb)). Moving from left to right adds overdispersion in the observations. Solid line shows the simulated observed cases (15 time steps); dashed line shows the median of the posterior forecast sample with 50% (dark ribbon) and 90% (light ribbon) confidence intervals (last 5 time steps).

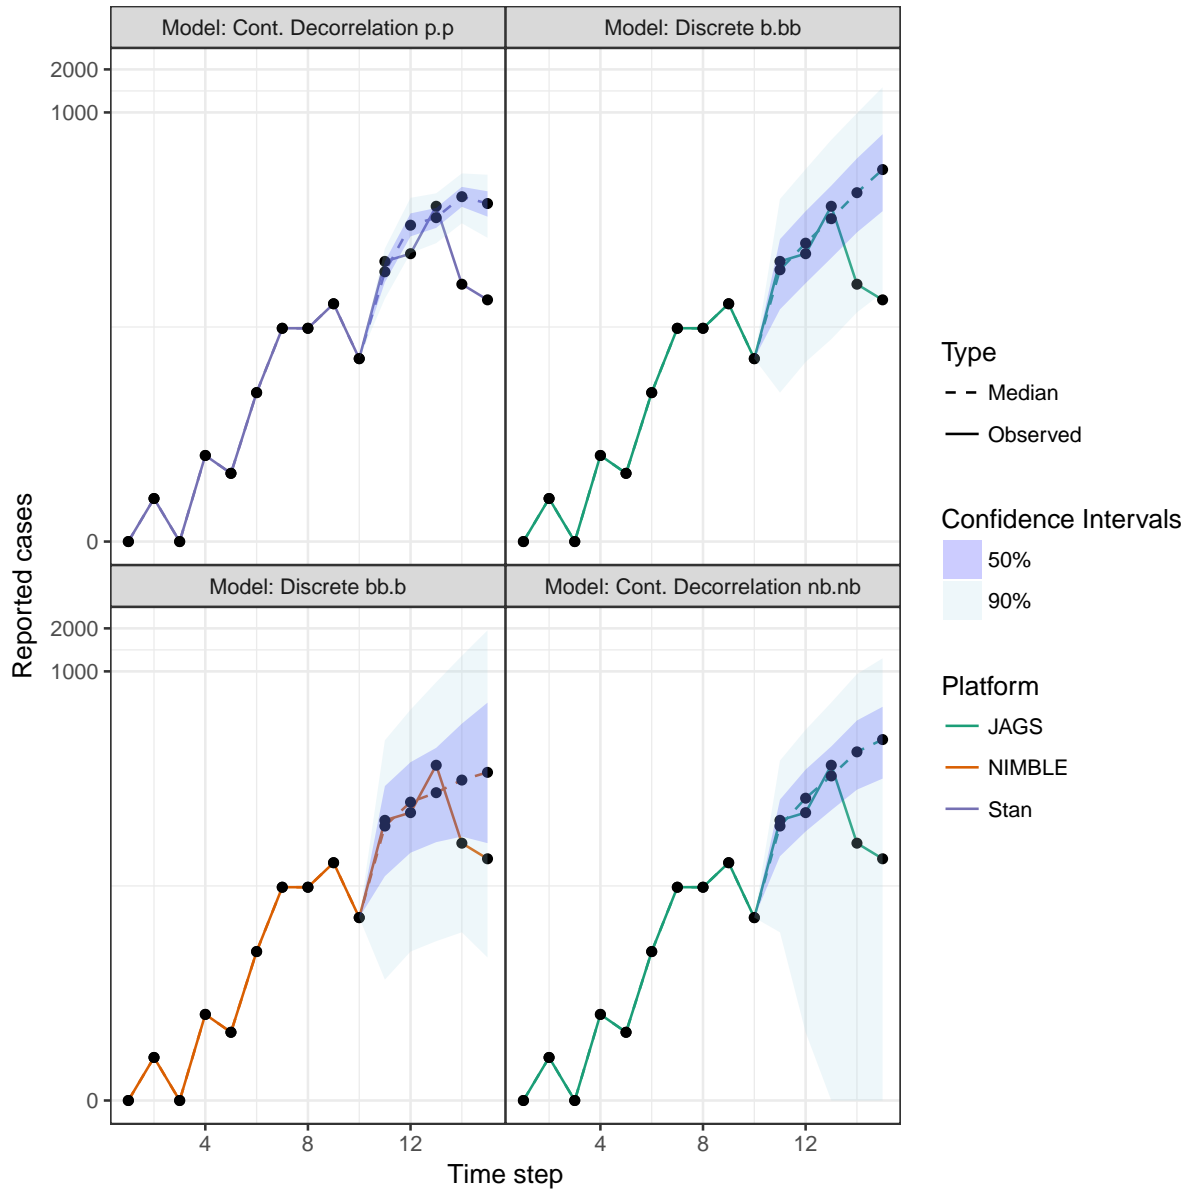

**Figure S10.** Comparison of forecast using a different set of parameters. See Figure S9 for details.

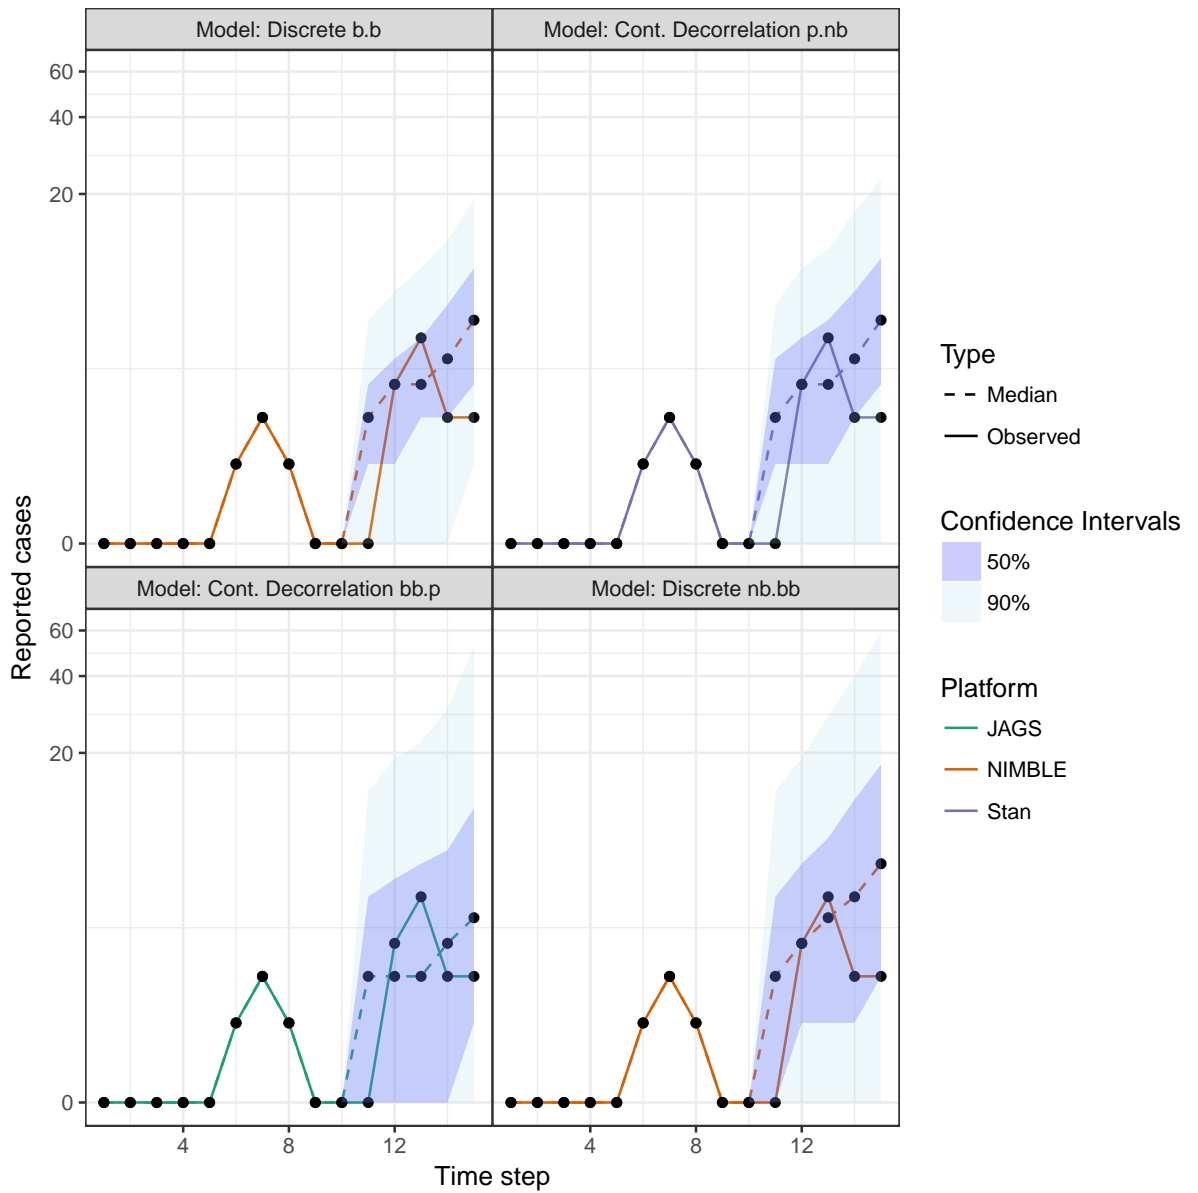

**Figure S11.** Comparison of forecast of low observed cases. See Figure S9 for details.

## Tables

**Table 1.** Simulation model parameters

| Parameter             | Description                                        | True                  | Prior                                                                                         |
|-----------------------|----------------------------------------------------|-----------------------|-----------------------------------------------------------------------------------------------|
| $N$                   | Total population size                              | Fixed at 100,000      | NA                                                                                            |
| $\ell$                | Maximum length of the generation interval          | Fixed at 5 time steps | NA                                                                                            |
| $\mathcal{R}_0$       | Basic reproductive number                          | 3                     | Gamma(shape=15,rate=5)                                                                        |
| $P_{\text{eff}}$      | Effective susceptible proportion of the population | 0.5                   | Beta( $\frac{B_{\text{size}}}{1-P_{\text{eff}}}$ , $\frac{B_{\text{size}}}{P_{\text{eff}}}$ ) |
| $P_{\text{rep}}$      | Reporting proportion                               | 0.5                   | Beta( $\frac{B_{\text{size}}}{1-P_{\text{rep}}}$ , $\frac{B_{\text{size}}}{P_{\text{rep}}}$ ) |
| $G_p$                 | Position parameter for generation interval         | 0.5                   | Beta( $\frac{2B_{\text{size}}}{1-G_p}$ , $\frac{2B_{\text{size}}}{G_p}$ )                     |
| $G_s$                 | Shape parameter for generation interval            | 1                     | Gamma(shape=5,rate=5)                                                                         |
| $\delta_P$            | Beta Binomial transmission process dispersion      | 1                     | Gamma(shape=10,rate=10)                                                                       |
| $\delta_{\text{obs}}$ | Beta-Binomial Observation process dispersion       | 1                     | Gamma(shape=10,rate=10)                                                                       |

**Table 2.** Fitting model parameters

| Parameter                         | Description                                        | True                                   | Prior                                                                                               |
|-----------------------------------|----------------------------------------------------|----------------------------------------|-----------------------------------------------------------------------------------------------------|
| $N$                               | Total population size                              | Fixed at 100,000                       | NA                                                                                                  |
| $\ell$                            | Maximum length of the generation interval          | Fixed at 5 time steps                  | NA                                                                                                  |
| $B_{\text{size}}$                 | Beta prior size factor                             | Fixed at 1                             | NA                                                                                                  |
| $\mathcal{R}_0$                   | Basic reproductive number                          | 3                                      | Gamma(shape=15,rate=5)                                                                              |
| $P_{\text{eff}}$                  | Effective susceptible proportion of the population | 0.5                                    | Beta( $\frac{B_{\text{size}}}{1-P_{\text{eff}}}$ , $\frac{B_{\text{size}}}{P_{\text{eff}}}$ )       |
| $P_{\text{rep}}$                  | Reporting proportion                               | 0.5                                    | Beta( $\frac{B_{\text{size}}}{1-P_{\text{rep}}}$ , $\frac{B_{\text{size}}}{P_{\text{rep}}}$ )       |
| $P_{\text{effrep}}$               | Proportion of effective S to I that are observed   | $P_{\text{eff}} \times P_{\text{rep}}$ | Beta( $\frac{B_{\text{size}}}{1-P_{\text{effrep}}}$ , $\frac{B_{\text{size}}}{P_{\text{effrep}}}$ ) |
| $\rho$                            | Scale splitting factor                             | 0.5                                    | Beta( $\frac{B_{\text{size}}}{1-\rho}$ , $\frac{B_{\text{size}}}{\rho}$ )                           |
| $G_p$                             | Position parameter for generation interval         | 0.5                                    | Beta( $\frac{2B_{\text{size}}}{1-G_p}$ , $\frac{2B_{\text{size}}}{G_p}$ )                           |
| $G_s$                             | Shape parameter for generation interval            | 1                                      | Gamma(shape=5,rate=5)                                                                               |
| $\delta_P$                        | Beta Binomial transmission process dispersion      | 1                                      | Gamma(shape=10,rate=10)                                                                             |
| $\delta_P$ (Neg-Binom)            | Negative-Binomial Transmission process dispersion  | NA                                     | Uniform(min=0,max=100)                                                                              |
| $\delta_{\text{obs}}$             | Beta-Binomial Observation process dispersion       | 1                                      | Gamma(shape=10,rate=10)                                                                             |
| $\delta_{\text{obs}}$ (Neg-Binom) | Negative-Binomial Transmission process dispersion  | NA                                     | Uniform(min=0,max=100)                                                                              |
